1 **Association of simple renal cysts and chronic kidney disease with**  
2 **large abdominal aortic aneurysm**

3

4 **Milena Mischczuk<sup>1</sup>, Verena Müller<sup>2</sup>, Christian E. Althoff<sup>3</sup>, Andrea Stroux<sup>4</sup>, Daniela**  
5 **Widhalm<sup>1</sup>, Andy Dobberstein<sup>1</sup>, Andreas Greiner<sup>1</sup>, Helena Kuivaniemi<sup>5</sup>, Irene Hinterseher<sup>1\*</sup>**

6

7 <sup>1</sup>Vascular Surgery Clinic, Campus Charité Benjamin Franklin, <sup>2</sup>Surgical Clinic, Campus Charité  
8 Mitte and Campus Virchow-Klinikum, <sup>3</sup>Institute of Radiology, Campus Charité Mitte, <sup>4</sup>Institute of  
9 Medical Biometrics and Clinical Epidemiology, Campus Charité Benjamin Franklin, Charité –  
10 Universitätsmedizin Berlin, corporate member of Freie Universität Berlin, Humboldt-Universität  
11 zu Berlin, and Berlin Institute of Health, Berlin, Germany, <sup>5</sup>Division of Molecular Biology and  
12 Human Genetics, Department of Biomedical Sciences, Faculty of Medicine and Health  
13 Sciences, Stellenbosch University, Tygerberg, South Africa

14

15 Drs. Mischczuk and Müller contributed equally to this work.

16

17 \*Correspondence to:

18 Dr. Irene Hinterseher

19 Charité – Universitätsmedizin Berlin,

20 Klinik für Gefäßchirurgie, Campus Benjamin Franklin,

21 Hindenburgdamm 30

22 12200 Berlin

23 Germany

24 Phone: +49 30 450 522 725

25 Fax: +49 30 450 7522 902

26 E-mail: [irene.hinterseher@charite.de](mailto:irene.hinterseher@charite.de)

27

28 Word count for text: 3,614 (excluding references)

29 Word count of abstract: 189

30 Number of figures: 1

31 Number of tables: 4

32 Supplementary file: Data file on all study patients for all variables used in the study.

## 34 **Abstract**

35 Abdominal aortic aneurysms (AAA) primarily affect elderly men who often have many other  
36 diseases, with similar risk factors and pathobiological mechanisms to AAA. The aim of this study  
37 was to assess the prevalence of simple renal cysts (SRC), chronic kidney disease (CKD), and  
38 other kidney diseases (e.g. nephrolithiasis) among patients presenting with AAA. Two groups of  
39 patients (100/group), with and without AAA, from the Surgical Clinic Charité, Berlin, Germany,  
40 were selected for the study. The control group consisted of patients who were evaluated for a  
41 kidney donation (n = 14) and patients who were evaluated for an early detection of a melanoma  
42 recurrence (n = 86). The AAA and control groups were matched for age and sex. Medical  
43 records were analyzed and computed tomography scans were reviewed for the presence of  
44 SRC and nephrolithiasis. SRC (73% vs. 57%;  $p < 0.001$ ) and CKD (31% vs. 8%;  $p < 0.001$ ) were  
45 both more common among AAA than control group patients. On multivariate analysis, CKD, but  
46 not SRC, showed a strong association with AAA. Knowledge about pathobiological mechanisms  
47 and association between CKD and AAA could provide better diagnostic and therapeutic  
48 approaches for these patients.

49

50 **Key words:** Abdominal aortic aneurysm, renal cyst, chronic kidney disease

51

## 52 **Introduction**

53 Abdominal aortic aneurysm (AAA) is the most common type of aneurysm, and is defined as an  
54 abdominal aortic diameter  $> 3$  cm [1]. According to recent literature, the prevalence of AAA has  
55 decreased in the last decades and is 1–2% [2]. This change can be primarily attributed to a  
56 decreased prevalence of smoking [2, 3]. The prevalence of AAA, however, increases with age  
57 and is 4.1%–14.2% in men and 0.35 – 6.2% in women  $> 65$  years [4, 5].

58

59 As AAA is asymptomatic in the majority of cases [6], it is often initially detected as an incidental  
60 finding during ultrasound or computed tomography (CT) examinations. Unfortunately, many  
61 AAA cases remain undetected until rupture. The mortality rate of a ruptured AAA is estimated to  
62 be 74–90% [7, 8], with a 32–83% pre-hospital mortality rate [7, 9]. One way to reduce this trend,  
63 is to implement a national AAA screening program to detect AAA before rupture [10]. Such a  
64 program was launched successfully in the USA in 2007 [11] and in the Great Britain in 2009  
65 [12].

66

67 A number of risk factors for AAA have been identified. The four primary risk factors are male  
68 sex, age > 65 years, smoking and a positive family history [13-18]. Several diseases appear to  
69 often co-exist with AAA, including chronic obstructive pulmonary disease (COPD) [13, 19, 20],  
70 different types of hernia [20], gallstones [21], and simple renal cysts (SRC) [22]. SRC is a  
71 common disease, with increased prevalence in older patients, affecting 24–27% of those > 50  
72 years of age [23, 24]. In older individuals, SRCs are even more common; Carrim et al. found an  
73 overall prevalence of 41% [25], while Chang et al. reported a prevalence of 35% in >60-year  
74 olds [26].

75

76 The co-occurrence of AAA and SRC [22, 27] can be explained by shared risk factors, e.g. older  
77 age [26, 28, 29], male sex [25, 30], hypertension [31] and smoking [26]. Ito et al. [22] stated “*the*  
78 *presence of renal cysts shows the strongest independent association with AAA among patients*  
79 *belonging to the 65 to 74 years old group and over 75 years old group*”. The exact pathogenesis  
80 of SRC remains unclear, but it is intriguing that both diseases demonstrate increased matrix  
81 metalloproteinase (MMP) levels, in the aortic wall in AAA patients [32] and in the cystic fluid in  
82 patients with SRCs [33].

83

84 Given the potentially shared pathophysiology between SRC and AAA, the primary aim of this  
85 study was to assess the prevalence of SRC and other kidney diseases among AAA patients,  
86 and compare the results to a group of age- and sex-matched non-AAA patients from the same  
87 hospital.

88

## 89 **Materials and methods**

90 The study was approved by the Charité Ethics Committee (approval number: EA1/309/16).

91 Since the study was a retrospective review of medical and imaging records, no informed  
92 consent from the patients was required according to the study approval.

93

### 94 **Study groups**

95 This study was a retrospective review of patients' medical records including radiology records.

96 Two groups of patients (100/group) were compared in the study. All 200 patients had undergone  
97 a computed tomography-angiography (CTA) scan. The first group included patients, who  
98 underwent AAA surgery in 2004 – 2012 at Charité Clinic Campus Mitte in Berlin, Germany.  
99 Surgeries were performed either as elective (unruptured AAA; n=94) or as emergency (ruptured  
100 AAA; n= 6) operations. The exclusion criteria were an abdominal aortic diameter <3 cm, AAA  
101 operation before 2004, diagnosis of rare genetic disorder such as Marfan syndrome or Ehlers-  
102 Danlos syndrome, and the presence of any other arterial aneurysm. One AAA patient was  
103 diagnosed with Marfan syndrome and was, therefore, excluded from further analyses, leaving  
104 99 AAA patients for the analyses presented here. For the AAA patients, the pre-operative scans  
105 were used.

106

107 The control group (n=100) included patients without AAA investigated at the Institute of

108 Radiology of Charité Clinic, Berlin, Germany, and consisted of patients who were evaluated for

109 a kidney donation in 2005 – 2014 (n = 14) and patients who were evaluated for an early  
110 detection of a melanoma recurrence (n = 86). We chose this group of patients as a control  
111 group for the following reasons: 1) they were also examined by abdominal CTA; 2) melanoma is  
112 an age-related disease and a disease of a different organ, not the aorta; and 3) they were from  
113 the same hospital system. Also, there were no differences in the mean height, weight, or BMI  
114 between the AAA and control groups [34].

115  
116 AAA patients and controls were matched on sex and age ( $\pm 2$  years). For the AAA patients, age  
117 at the time of the first AAA diagnosis was used for this analysis. If this information was missing,  
118 age at the time of AAA surgery was taken. For the control group, age during the CTA scan was  
119 used for the analysis.

120

#### 121 **Clinical data**

122 For the analysis of the CTA scans, Centricity eRadCockpit Software (GE Healthcare, Chalfont  
123 St Giles, Great Britain) was used. First, written reports from board-certified radiologists were  
124 reviewed by one of the authors (M.M.). As SRCs are common, sometimes they were not  
125 described as a diagnosis in the report. For that reason, the CTA scans were assessed again for  
126 the presence of SRC (Fig 1) and kidney stones. Results were discussed with a board-certified  
127 radiologist (C.E.A.).

128

129 Individual data on all study patients for all variables used in the study are available in the  
130 Supplementary file.

132

133

134 **Fig. 1. Simple renal cyst detected in a CT scan.** Contrast-enhanced CT scan of the abdomen  
135 in axial (A) and coronal (B) plane, arterial phase, demonstrates an AAA (arrow head) with mural  
136 thrombus and patent lumen and a large hypodense mass on the lower left renal pole,  
137 representing a simple renal cyst (arrow).

138

139 SRC (ICD-10: N28.1) were divided into subgroups according to their size: Group 1:  $\leq 1$  cm;  
140 Group 2: 1.01 – 3.0 cm; Group 3: 3.1 – 5.0 cm; and Group 4:  $>5$  cm. SRCs were also classified  
141 using Bosniak Classification System: I: simple, benign cysts; II: minimally complicated benign  
142 cystic lesions; III: more complicated cystic lesions; and IV: cystic carcinoma [35].

143

144 Nephrolithiasis (ICD-10: N20.0) was defined as a presence of kidney stones on the CTA scans.

145

146 Additional patient data [34] were collected from the medical records using the patient data  
147 management program SAP (SAP SE, Walldorf, Germany). Information about the presence of  
148 chronic kidney disease (CKD) was collected. CKD was defined as a presence of the following  
149 ICD-10 diagnostic codes in the medical records: N18.1 for CKD stage 1, N18.2 for CKD stage 2,  
150 N18.3 for CKD stage 3, N18.4 for CKD stage 4, N18.5 for CKD stage 5, and Z94.0 for renal  
151 transplantation. Additional diseases in the same study groups are described in another study  
152 [34].

153

#### 154 **Statistical analysis**

155 For statistical analyses SPSS Statistics Version 22 for Windows (IBM, Armonk, New York, USA)  
156 was used. First, a univariable analysis was carried out. For quantitative variables, the mean,

157 median, standard deviation, minimal and maximal values were determined. The categorical  
158 variables were analyzed using cross-tabulation. The differences between the two groups were  
159 determined using Mann-Whitney U test or chi-squared test (Fisher's exact test) where  
160 appropriate. A difference was defined significant, if  $p \leq 0.05$ .

161

162 The univariable analysis was followed by a multivariable analysis to identify independent risk  
163 factors. Significant values from the univariable analysis were included in a multiple logistic  
164 regression model. This included the following parameters: ever smoker, peripheral artery  
165 disease (PAD), pack years of smoking, incisional hernia, any hernia, congestive heart failure,  
166 American Society of Anesthesiologists (ASA) score, diabetes mellitus, coronary bypass,  
167 creatinine, COPD, current smoker, coronary artery disease, diverticulosis, platelet count [34]  
168 and SRC. Parameters with >50% of the values missing were excluded from the analysis. A  
169 forward and backward analysis was performed. Odds ratios (OR) and a 95% confidence  
170 intervals (CI) were calculated.

171

## 172 **Results**

173 Our study included 99 (78 male and 21 female) AAA patients and 100 (79 male and 21 female)  
174 age- and sex-matched controls. Altogether, 30.3% AAA and 8% control patients had CKD  
175 diagnosis in their medical records ( $p < 0.001$ ; Table 1). The distribution of CKD stages was also  
176 statistically significantly different between the study groups ( $p = 0.002$ ; Table 1). One AAA patient  
177 received a renal transplantation due to the CKD. Nephrolithiasis was found in 2% of the AAA  
178 and 7.1% of the control patients ( $p = 0.1$ ). SRCs were found amongst 72.7% AAA patients and  
179 57% controls, resulting in a statistically significant difference (Table 1;  $p = 0.009$ ). Among AAA  
180 patients, two had been diagnosed with autosomal dominant polycystic kidney disease (ADPKD)



181 and were excluded from further evaluations.

182

183 **Table 1. Comparison of simple renal cysts and chronic kidney disease between study**

184 **groups.**

| Variable                                      | AAA group              |                         | Control group          |                         | <i>p</i> <sup>a</sup> |
|-----------------------------------------------|------------------------|-------------------------|------------------------|-------------------------|-----------------------|
|                                               | <i>With variable n</i> | <i>Data available n</i> | <i>With variable n</i> | <i>Data available n</i> |                       |
| CKD, all stages <sup>b</sup>                  | 30                     | 99                      | 8                      | 100                     | <0.001                |
| CKD stage 1/2/3/4/5/RTX <sup>c</sup>          | 5/9/11/1/3/1           | 99                      | 1/4/3/0/0/0            | 100                     | 0.002                 |
| Nephrolithiasis                               | 2                      | 99                      | 7                      | 98                      | 0.10                  |
| SRC (both right and left kidney) <sup>d</sup> | 72                     | 99                      | 57                     | 100                     | 0.01                  |
| SRC, right kidney only                        | 58                     | 99                      | 46                     | 100                     | 0.04                  |
| 1 – 4 SRC in right kidney <sup>d</sup>        | 46                     | 99                      | 41                     | 100                     | 0.05                  |
| >5 SRC in right kidney <sup>d</sup>           | 12                     | 99                      | 5                      | 100                     | 0.05                  |
| SRC, left kidney only <sup>d</sup>            | 60                     | 98                      | 33                     | 100                     | <0.001                |
| 1 – 4 SRC in left kidney <sup>d</sup>         | 48                     | 98                      | 29                     | 100                     | <0.001                |

> 5 SRC in left kidney<sup>d</sup> | 12 | 98 | 4 | 100 | <0.001

185 <sup>a</sup>Chi-square test

186 <sup>b</sup>Defined as presence of ICD-10 code in medical records: N18.1 for CKD stage 1, N18.2 for

187 CKD stage 2, N18.3 for CKD stage 3, N18.4 for CKD stage 4, N18.5 for CKD stage 5 or Z94.0

188 for renal transplantation.

189 <sup>c</sup>Defined as presence of kidney stones (ICD-10: N20.0) on the CTA scans.

190 <sup>d</sup>Defined as presence of simple renal cysts (ICD-10: Q61.9) on the CTA scans.

191 CKD: chronic kidney disease; SRC: simple renal cyst; RTX: renal transplantation.

192

193

194 In the right kidney, SRCs were found in 58.6% of AAA patients and in 46% of controls

195 (p=0.039). In the AAA group, 46.5% of patients had 1–4 SRCs, and 12.1% of patients had ≥5

196 SRCs. In the control group, these numbers were 41% and 5%, respectively (p=0.048, for both

197 comparisons). In the right kidney, SRCs ≤1 cm were significantly more common among AAA

198 than control patients (p<0.001; Table 2).

199

200 **Table 2. Simple renal cysts in the right kidney classified according to their size.**

| SRC<br>classification<br>based on size | AAA group                                |                                                                     |                           | Control group                            |                                                                     |                           | <i>p</i> <sup>a</sup> |
|----------------------------------------|------------------------------------------|---------------------------------------------------------------------|---------------------------|------------------------------------------|---------------------------------------------------------------------|---------------------------|-----------------------|
|                                        | <i>Number of<br/>SRC per<br/>patient</i> | <i>Median<br/>Data<br/>number of availa<br/>SRC per<br/>patient</i> | <i>Data<br/>ble<br/>n</i> | <i>Number of<br/>SRC per<br/>patient</i> | <i>Median<br/>Data<br/>number of availa<br/>SRC per<br/>patient</i> | <i>Data<br/>ble<br/>n</i> |                       |
|                                        | <i>Mean±/-SD</i>                         | <i>patient</i>                                                      | <i>n</i>                  | <i>Mean±/-SD</i>                         | <i>patient</i>                                                      | <i>n</i>                  |                       |
|                                        |                                          |                                                                     |                           |                                          |                                                                     |                           |                       |
| ≤1 cm                                  | 1.15 ± 1.86                              | 0                                                                   | 97                        | 0.50 ± 1.45                              | 0                                                                   | 100                       | <0.001                |

|                 |             |   |    |             |   |     |      |
|-----------------|-------------|---|----|-------------|---|-----|------|
| 1.1 cm – 3.0 cm | 0.43 ± 0.95 | 0 | 97 | 0.41 ± 0.79 | 0 | 100 | 0.99 |
| 3.1 cm – 5.0 cm | 0.10 ± 0.34 | 0 | 97 | 0.05 ± 0.26 | 0 | 100 | 0.15 |
| >5 cm           | 0.02 ± 0.14 | 0 | 97 | 0.04 ± 0.20 | 0 | 100 | 0.68 |

201 <sup>a</sup>Mann-Whitney U test

202 SRC, simple renal cyst

203

204 In the left kidney, SRCs were found in 61.2% of AAA and 33% of control patients ( $p < 0.001$ ). In  
 205 the AAA group, 49% of patients had 1–4 SRCs, and 12.2% of patients had  $\geq 5$  SRCs. In the  
 206 control group, these numbers were 29% and 4%, respectively ( $p < 0.001$ , for both variables). In  
 207 the left kidney, both small ( $\leq 1$  cm;  $p < 0.001$ ) and medium size (1 – 3 cm;  $p = 0.020$ ) SRCs were  
 208 significantly more common among AAA than control patients (Table 3). In the AAA group, we  
 209 also found two patients with SRCs classified as Bosniak II and two patients with SRCs classified  
 210 as Bosniak III. In the control group, one patient each with Bosniak II and Bosniak III were found.  
 211 There were 46 (46.5%) AAA and 22 (22%) control group patients who had bilateral SRC  
 212 disease, whereas 25 (25.3%) AAA and 34 (34%) control patients had SRCs in only the left or  
 213 right kidney ( $p = 0.001$ ).

214

215 **Table 3. Simple renal cysts in the left kidney classified according to their size.**

| SRC<br>classification<br>based on size | AAA                                      |                                                                  |                      | Controls                                 |                                                                  |                      | $p^a$ |
|----------------------------------------|------------------------------------------|------------------------------------------------------------------|----------------------|------------------------------------------|------------------------------------------------------------------|----------------------|-------|
|                                        | <i>Number of<br/>SRC per<br/>patient</i> | <i>Median<br/>Data<br/>number of availa<br/>SRC per<br/>ble,</i> | <i>Data<br/>ble,</i> | <i>Number of<br/>SRC per<br/>patient</i> | <i>Median<br/>Data<br/>number of availa<br/>SRC per<br/>ble,</i> | <i>Data<br/>ble,</i> |       |
|                                        |                                          |                                                                  |                      |                                          |                                                                  |                      |       |

|                 | <i>Mean±SD</i> | <i>patient</i> | <i>n</i> | <i>Mean±SD</i> | <i>patient</i> | <i>n</i> |        |
|-----------------|----------------|----------------|----------|----------------|----------------|----------|--------|
| ≤1 cm           | 1.28 ± 2.08    | 1              | 96       | 0.37 ± 1.17    | 0              | 100      | <0.001 |
| 1.1 cm – 3.0 cm | 0.56 ± 0.95    | 0              | 96       | 0.30 ± 0.73    | 0              | 100      | 0.02   |
| 3.1 cm – 5.0 cm | 0.10 ± 0.31    | 0              | 96       | 0.04 ± 0.20    | 0              | 100      | 0.10   |
| >5 cm           | 0.01 ± 0.10    | 0              | 96       | 0.00 ± 0.00    | 0              | 100      | 0.49   |

216 <sup>a</sup>Mann-Whitney U test

217 SRC, simple renal cyst

218

219 In multivariable analyses, which included ever smoker, PAD, pack years, incisional hernia, any  
 220 hernia, congestive heart failure, ASA score, diabetes mellitus, coronary bypass, creatinine,  
 221 COPD, current smoker, coronary artery disease, diverticulosis, platelet count and SRC, we  
 222 found a strong independent association between AAA and CKD (OR = 5.655; 95%CI = 1.785–  
 223 17.921; p=0.003). We found no direct association between SRC and AAA (OR = 1.711; 95%CI  
 224 = 0.625–4.682; p=0.296), when adjusting for other variables.

225

## 226 **DISCUSSION**

227 The main findings of our study were that CKD was more frequent in AAA than age- and sex-  
 228 matched control patients and showed a strong association with AAA in multivariable analysis,  
 229 which included ever smoker, PAD, pack years, incisional hernia, any hernia, congestive heart  
 230 failure, ASA score, diabetes mellitus, coronary bypass, creatinine, COPD, current smoker,  
 231 coronary artery disease, diverticulosis, platelet count and SRC. AAA patients also had a higher  
 232 rate of SRC, but SRCs were not independently associated with AAA.

233

234 Our study demonstrated a strong association between AAA and CKD with 30.3% of the AAA  
235 and only 8% of the age- and sex-matched control patients diagnosed with CKD. The AAA  
236 patients also exhibited a more advanced CKD stage. Previously published studies reported a  
237 wide range of CKD prevalence (3–65%) among AAA patients [20, 36-39]. Alnassar et al. [36]  
238 and Pitoulias et al. [40] found no significant difference in the prevalence of CKD between AAA  
239 and PAD patients [20, 36]. However, patients with a large AAA (>5.5 cm) had a significantly  
240 higher rate of CKD than patients with a small AAA (13% vs. 2%) [20]. Approximately half  
241 (54.3%) of the AAA patients in our study had a large AAA (>5.5 cm) and all were operated on  
242 for AAA, and the rate of CKD was over four times as high as the rate in the study of Pitoulias et  
243 al [20]. Furthermore, similar to the findings by Chun et al. [38] and Takeuchi et al. [39], our study  
244 demonstrated an independent association of AAA and CKD in multivariable analysis, not seen  
245 in the study by Pitoulias et al. [20].

246  
247 We estimated the prevalence of SRC to be 72.7% in the AAA and 57% in the control group.  
248 Based on previous literature, the SRC prevalence in general population varies 4.2–41% [25,  
249 28], which is lower than in the current study (Table 4). Similarly, the SRC prevalence among  
250 AAA patients in the current study was higher than in most of the previous studies, which  
251 reported a prevalence of 38–69% among AAA patients and 18–45% for controls [20, 22, 27, 41-  
252 43]. A recent study by Brownstein et al. [43] analyzed a total of 35,498 patients who underwent  
253 both chest and abdominal CT imaging during a 4-year period. Altogether 18% of these patients  
254 had SRC and 2.6% had AAA. Compared with the matched population without SRC, patients  
255 with SRC demonstrated an increased prevalence of AAA (8% vs. 3%). They were also more  
256 likely to have thoracic, ascending and descending aortic aneurysms or dissections [43]. Five  
257 previous studies found an independent association between AAA and SRC in a multivariable  
258 analysis [20, 22, 27, 41, 43], but we could not confirm this in our study. However, three of those  
259 studies [22, 41, 43] examined a significantly larger patient group.

260 **Table 4. Prevalence of SRC in AAA and control patients in published studies.**

| Study reference      | Number of AAA/controls | Prevalence of SRC (%) |                 | Univariate analysis |                    | Multivariate analysis |                                 |
|----------------------|------------------------|-----------------------|-----------------|---------------------|--------------------|-----------------------|---------------------------------|
|                      |                        | AAA                   | Controls        | p value             | OR (95%CI)         | p value               | OR (95%CI)                      |
| Current study        | 99/100                 | 73                    | 57              | 0.008               | NA                 | 0.30                  | 1.71 (0.63 – 4.68)              |
| Pitoulis et al. [20] | 10/60                  | 69                    | 27              | <0.001              | 0.16 (0.08 – 0.33) | <0.001                | 0.23 (0.11 – 0.48)              |
| Ito et al. [22]      | 16/102 <sup>a</sup>    | 38 <sup>a</sup>       | 29 <sup>a</sup> | 0.56 <sup>a</sup>   | NA                 | 0.002 <sup>b</sup>    | 4.15 <sup>b</sup> (1.72 –       |
|                      | 56/88 <sup>b</sup>     | 63 <sup>b</sup>       | 37 <sup>b</sup> | 0.002 <sup>b</sup>  |                    | 0.02 <sup>c</sup>     | 10.03)                          |
|                      | 52/81 <sup>c</sup>     | 56 <sup>c</sup>       | 38 <sup>c</sup> | 0.05 <sup>c</sup>   |                    |                       | 3.00 <sup>c</sup> (1.16 – 7.73) |
| Song et al.[41]      | 271/1,387              | 55 <sup>d</sup>       | 19 <sup>d</sup> | 0.001 <sup>d</sup>  | NA                 | 0.04                  | 2.64 (1.05 – 6.63)              |
|                      |                        | 56 <sup>e</sup>       | 29 <sup>e</sup> | 0.03 <sup>e</sup>   |                    |                       |                                 |

|                        |         |    |    |        |                   |                   |                                 |
|------------------------|---------|----|----|--------|-------------------|-------------------|---------------------------------|
| Spanos et al. [42]     | 100/100 | 63 | 45 | NA     | NA                | 0.02 <sup>f</sup> | NA                              |
| Yaghoubian et al. [27] | 100/100 | 54 | 30 | 0.0006 | 2.73 (1.53 – 4.9) | 0.03 <sup>f</sup> | 2.05 <sup>f</sup> (1.08 – 3.88) |

---

261 <sup>a</sup>Patients <65 years.

262 <sup>b</sup>Patients 65 – 74 years.

263 <sup>c</sup>Patients >75 years.

264 <sup>d</sup>Data for the entire sample group.

265 <sup>e</sup>Data for the matched group.

266 <sup>f</sup>AAA as predictive factor for SRC.

267 NA, no data available; CI, confidence interval; OR, odds ratio; SRC, simple renal cyst.

268

269 An important difference between our study and the previous studies on SRCs is that in our  
270 study patients were not stratified according to age, which could explain our negative results in  
271 the multivariable analysis. Ito et al. [22] found an association between AAA and SRC in their  
272 multivariable analysis, but only in patients >65 years. Another important factor is the age of  
273 patients with and without SRC. Prior studies have confirmed that SRC develops mostly at older  
274 age [24, 25, 28, 29, 41, 42], and Ito et al. [22] and Yaghoubian et al. [27] found a significant  
275 difference in the age of patients with and without SRC .

276

277 Our study showed an asymmetric distribution of SRCs between the left and right kidney. In  
278 controls, the right kidney was more often affected than the left kidney (46% vs. 33%), whereas  
279 in the AAA group, both kidneys were affected as often (58.6% vs. 61.2%). One previous study  
280 demonstrated that a bilateral appearance of SRC increased the risk of hypertension (OR = 3.48,  
281 95%CI = 2.12–5.71) [44]. Also the presence of multiple SRC ( $\geq 2$ ) was associated with an  
282 increased risk of hypertension [44]. Previous studies have also examined the correlation  
283 between SRC size and hypertension, but an association with hypertension was found only for  
284 SRCs > 1 cm in diameter [44].

285

286 SRC and AAA share some common risk factors, e.g. older age, male sex and hypertension [25,  
287 26, 28, 29, 31, 45], and some studies also mention smoking as a possible risk factor for SRC  
288 [26]. Molecular studies suggest that MMPs play a role in the pathophysiology of SRC and AAA  
289 [33]. Furthermore, one study on 108 autopsies showed a correlation between the diameter of  
290 the abdominal aorta and the number of SRC [46].

291

292 Further research on kidney diseases and AAA is not only of academic, but also of clinical  
293 interest. Nowadays, the majority of AAA are repaired using endovascular aneurysm repair



294 (EVAR), which requires a contrast agent administration, known to be nephrotoxic. Only one  
295 study has investigated the kidney function in patients with SRC after EVAR [42], and found that  
296 patients with SRC had slightly higher creatinine levels, both before and after surgery, but the  
297 difference was not statistically significant [42]. There was no significant difference in the  
298 creatinine levels after EVAR [42], leading to the conclusion that kidney function is not affected  
299 by the presence of SRC. As we have reported previously, in the current study population, the  
300 AAA group patients had significantly higher creatinine levels than the control group patients [34].

301  
302 Nephrolithiasis is a common problem in the elderly population. A higher prevalence of  
303 nephrolithiasis has been reported in patients with SRC [26] and ADPKD [47]. The relationship  
304 between renal stones and AAA has not been investigated previously. As SRC and ADPKD  
305 appear frequently in AAA patients [22, 27], one might expect that nephrolithiasis affects AAA  
306 patients as well. In our study population, we found no association between AAA and  
307 nephrolithiasis. Nonetheless, when examining a patient with a renal colic, one should consider a  
308 symptomatic or ruptured AAA as a potential differential diagnosis.

309  
310 The association between AAA and CKD also requires further research by examining the role  
311 CKD plays on the development and progression of AAA. It has been reported that blood vessel  
312 walls in patients with CKD are thinner, which can increase the risk for rupture [48]. The co-  
313 occurrence of AAA and CKD also has several clinical implications, since CKD increases the rate  
314 of complications after surgery [49]. The clot inside the aneurysm sac can also impair the blood  
315 perfusion of renal arteries (e.g. by embolization).

316  
317 The main limitation of our study is the fact that this was a retrospective single-center study with  
318 a small number of patients and controls. Another possible limitation is the fact that the control  
319 group consisted of patients with melanoma and those evaluated for kidney donation and their

320 comorbidity profile might not be representative of the general population. Also, our study  
321 evaluated patients with larger AAAs which were treated surgically. This might have caused a  
322 selection bias and the results might not be representative of all AAA patients. A major  
323 advantage of our study was matching of patients and controls on sex and age minimizing the  
324 confounding effects attributed to these factors.

325  
326 A better understanding about the pathophysiology of AAA will facilitate the development of  
327 pharmacotherapies for AAA. Also, this knowledge could be used for a better risk stratification.  
328 By introducing a national screening program in every country, AAA could be detected earlier. It  
329 is also important to consider the possible complications arising from CKD, both after open  
330 aneurysm repair, and EVAR. This group of patients should be given special attention and risk  
331 factor analysis should be carried out. The risk of rupture should be high enough to justify the risk  
332 of surgery. Further research is also needed on patients with small AAA who develop problems  
333 in kidney function. It remains to be determined if renal function is also affected by an expansion  
334 and different types of AAA where the renal arteries are involved.

335  
336 **Funding:** This research received no specific grant from any funding agency in the public,  
337 commercial, or not-for-profit sectors.

338  
339 **Data Availability Statement:** All relevant data are within the paper and the files part of the  
340 Supporting Information.

341  
342 **Supporting information**

343 S1 File. Dataset containing all information on every patient included in the study (Excel format).

344

## 345 **References**

- 346 [1] Moll FL, Powell JT, Fraedrich G, Verzini F, Haulon S, Waltham M, et al. Management of  
347 abdominal aortic aneurysms clinical practice guidelines of the European society for  
348 vascular surgery. *Eur J Vasc Endovasc Surg* 2011;41 Suppl 1:S1-S58.
- 349 [2] Lilja F, Wanhainen A, Mani K. Changes in abdominal aortic aneurysm epidemiology. *J*  
350 *Cardiovasc Surg (Torino)* 2017;58:848-53.
- 351 [3] Lederle FA. The rise and fall of abdominal aortic aneurysm. *Circulation* 2011;124:1097-  
352 9.
- 353 [4] Cornuz J, Sidoti Pinto C, Tevaearai H, Egger M. Risk factors for asymptomatic abdominal  
354 aortic aneurysm: systematic review and meta-analysis of population-based screening  
355 studies. *Eur J Public Health* 2004;343-9.
- 356 [5] Fleming C, Whitlock EP, Beil TL, Lederle FA. Screening for abdominal aortic aneurysm: a  
357 best-evidence systematic review for the U.S. Preventive Services Task Force. *Ann Intern*  
358 *Med* 2005;142:203-11.
- 359 [6] Keisler B, Carter C. Abdominal aortic aneurysm. *Am Fam Physician* 2015;91:538-43.
- 360 [7] Reimerink JJ, van der Laan MJ, Koelemay MJ, Balm R, Legemate DA. Systematic review  
361 and meta-analysis of population-based mortality from ruptured abdominal aortic  
362 aneurysm. *Br J Surg* 2013;100:1405-13.
- 363 [8] Acosta S, Ogren M, Bengtsson H, Bergqvist D, Lindblad B, Zdanowski Z. Increasing  
364 incidence of ruptured abdominal aortic aneurysm: a population-based study. *J Vasc Surg*  
365 2006;44:237-43.
- 366 [9] Guirguis-Blake JM, Beil TL, Sun X, Senger CA, Whitlock EP. Primary care screening for  
367 abdominal aortic aneurysm: an evidence update for the U.S. preventive services task force.  
368 Evidence Synthesis No 109 AHRQ Publication No 14-05202-EF-1 Rockville, MD: Agency for  
369 Healthcare Research and Quality 2014.
- 370 [10] Siso-Almirall A, Kostov B, Navarro Gonzalez M, Cararach Salami D, Perez Jimenez A,  
371 Gilabert Sole R, et al. Abdominal aortic aneurysm screening program using hand-held  
372 ultrasound in primary healthcare. *PLoS One* 2017;12:e0176877.
- 373 [11] Lederle FA. Screening for AAA in the USA. *Scand J Surg* 2008;97:139-41.
- 374 [12] Benson RA, Poole R, Murray S, Moxey P, Loftus IM. Screening results from a large  
375 United Kingdom abdominal aortic aneurysm screening center in the context of optimizing  
376 United Kingdom National Abdominal Aortic Aneurysm Screening Programme protocols. *J*  
377 *Vasc Surg* 2016;63:301-4.
- 378 [13] Simoni G, Pastorino C, Perrone R, Ardia A, Gianrossi R, Decian F, et al. Screening for  
379 abdominal aortic aneurysms and associated risk factors in a general population. *Eur J Vasc*  
380 *Endovasc Surg* 1995;10:207-10.
- 381 [14] Alcorn HG, Wolfson SK, Jr., Sutton-Tyrrell K, Kuller LH, O'Leary D. Risk factors for  
382 abdominal aortic aneurysms in older adults enrolled in The Cardiovascular Health Study.  
383 *Arterioscler Thromb Vasc Biol* 1996;16:963-70.
- 384 [15] Blanchard JF, Armenian HK, Friesen PP. Risk factors for abdominal aortic aneurysm:  
385 results of a case-control study. *Am J Epidemiol* 2000;151:575-83.
- 386 [16] Lederle FA, Johnson GA, Wilson SE, Chute EP, Hye RJ, Makaroun MS, et al. The  
387 aneurysm detection and management study screening program. *Arch Intern Med*  
388 2000;160:1425-30.

- 389 [17] Kent KC, Zwolak RM, Egorova NN, Riles TS, Manganaro A, Moskowitz AJ, et al. Analysis  
390 of risk factors for abdominal aortic aneurysm in a cohort of more than 3 million individuals.  
391 *J Vasc Surg* 2010;52:539-48.
- 392 [18] Wahlgren CM, Larsson E, Magnusson PK, Hultgren R, Swedenborg J. Genetic and  
393 environmental contributions to abdominal aortic aneurysm development in a twin  
394 population. *J Vasc Surg* 2010;51:3-7.
- 395 [19] Meijer CA, Kokje VB, van Tongeren RB, Hamming JF, van Bockel JH, Moller GM, et al. An  
396 association between chronic obstructive pulmonary disease and abdominal aortic  
397 aneurysm beyond smoking: results from a case-control study. *Eur J Vasc Endovasc Surg*  
398 2012;44:153-7.
- 399 [20] Pitoulias GA, Donas KP, Chatzimavroudis G, Torsello G, Papadimitriou DK. The role of  
400 simple renal cysts, abdominal wall hernia, and chronic obstructive pulmonary disease as  
401 predictive factors for aortoiliac aneurysmatic disease. *World J Surg* 2012;36:1953-7.
- 402 [21] Schuster JJ, Raptopoulos V, Baker S.P. Increased prevalence of cholelithiasis in  
403 patients with abdominal aortic aneurysm: sonographic evaluation. *Am J Roentgenol*  
404 1989;152:509-11.
- 405 [22] Ito T, Kawaharada N, Kurimoto Y, Watanabe A, Tachibana K, Harada R, et al. Renal  
406 cysts as strongest association with abdominal aortic aneurysm in elderly. *Ann Vasc Dis*  
407 2010;3:111-6.
- 408 [23] Laucks SP, Jr., McLachlan MS. Aging and simple cysts of the kidney. *Br J Radiol*  
409 1981;54:12-4.
- 410 [24] Tada S, Yamagishi J, Kobayashi H, Hata Y, Kobari T. The incidence of simple renal cyst  
411 by computed tomography. *Clin Radiol* 1983;34:437-9.
- 412 [25] Carrim ZI, Murchison JT. The prevalence of simple renal and hepatic cysts detected by  
413 spiral computed tomography. *Clin Radiol* 2003;58:626-9.
- 414 [26] Chang CC, Kuo JY, Chan WL, Chen KK, Chang LS. Prevalence and clinical characteristics  
415 of simple renal cyst. *J Chin Med Assoc* 2007;70:486-91.
- 416 [27] Yaghoubian A, de Virgilio C, White RA, Sarkisyan G. Increased incidence of renal cysts  
417 in patients with abdominal aortic aneurysms: a common pathogenesis? *Ann Vasc Surg*  
418 2006;20:787-91.
- 419 [28] Chin HJ, Ro H, Lee HJ, Na KY, Chae DW. The clinical significances of simple renal cyst: Is  
420 it related to hypertension or renal dysfunction? *Kidney Int* 2006;70:1468-73.
- 421 [29] Mosharafa AA. Prevalence of renal cysts in a Middle-Eastern population: an evaluation  
422 of characteristics and risk factors. *BJU Int* 2008;101:736-8.
- 423 [30] Terada N, Ichioka K, Matsuta Y, Okubo K, Yoshimura K, Arai Y. The natural history of  
424 simple renal cysts. *J Urol* 2002;167:21-3.
- 425 [31] Pedersen JF, Emamian SA, Nielsen M, B. Significant association between simple renal  
426 cysts and arterial blood pressure. *Br J Ur* 1997;79:688-92.
- 427 [32] Liapis CD, Paraskevas KI. The pivotal role of matrix metalloproteinases in the  
428 development of human abdominal aortic aneurysms. *Vasc Med* 2003;8:267-71.
- 429 [33] Harada H, Furuya M, Ishikura H, Shindo J, Koyanagi T, Yoshiki T. Expression of matrix  
430 metalloproteinase in the fluids of renal cystic lesions. *J Urol* 2002;168:19-22.
- 431 [34] Müller V, Mischczuk M, Althoff C, Stroux A, Greiner A, Kuivaniemi H, et al. Comorbidities  
432 Associated with Large Abdominal Aortic Aneurysms *Aorta* 2019;in press.
- 433 [35] Bosniak MA. The current radiological approach to renal cysts. *Radiology* 1986;158:1-  
434 10.

- 435 [36] Alnassar S, Bawahab M, Abdoh A, Guzman R, Al Tuwaijiri T, Louridas G. Incisional  
436 hernia postrepair of abdominal aortic occlusive and aneurysmal disease: five-year  
437 incidence. *Vascular* 2012;20:273-7.
- 438 [37] Barisione C, Garibaldi S, Brunelli C, Balbi M, Spallarossa P, Canepa M, et al. Prevalent  
439 cardiac, renal and cardiorenal damage in patients with advanced abdominal aortic  
440 aneurysms. *Intern Emerg Med* 2015.
- 441 [38] Chun KC, Teng KY, Chavez LA, Van Spyk EN, Samadzadeh KM, Carson JG, et al. Risk  
442 factors associated with the diagnosis of abdominal aortic aneurysm in patients screened at  
443 a regional Veterans Affairs health care system. *Ann Vasc Surg* 2014;28:87-92.
- 444 [39] Takeuchi H, Okuyama M, Uchida HA, Kakio Y, Umabayashi R, Okuyama Y, et al. Chronic  
445 Kidney Disease Is Positively and Diabetes Mellitus Is Negatively Associated with Abdominal  
446 Aortic Aneurysm. *PLoS One* 2016;11:e0164015.
- 447 [40] Sinden NJ, Baker MJ, Smith DJ, Kreft JU, Dafforn TR, Stockley RA. Alpha-1-antitrypsin  
448 variants and the proteinase/antiproteinase imbalance in chronic obstructive pulmonary  
449 disease. *Am J Physiol Lung Cell Mol Physiol* 2015;308:L179-90.
- 450 [41] Song BG, Park YH. Presence of renal simple cysts is associated with increased risk of  
451 abdominal aortic aneurysms. *Angiology* 2014.
- 452 [42] Spanos K, Rountas C, Saleptsis V, Athanasoulas A, Fezoulidis I, Giannoukas AD. The  
453 association of simple renal cysts with abdominal aortic aneurysms and their impact on  
454 renal function after endovascular aneurysm repair. *Vascular* 2016;24:150-6.
- 455 [43] Brownstein AJ, Bin Mahmood SU, Saeyeldin A, Velasquez Mejia C, Zafar MA, Li Y, et al.  
456 Simple renal cysts and bovine aortic arch: markers for aortic disease. *Open Heart*  
457 2019;6:e000862.
- 458 [44] Kim SM, Chung TH, Oh MS, Kwon SG, Bae SJ. Relationship of simple renal cyst to  
459 hypertension. *Korean J Fam Med* 2014;35:237-42.
- 460 [45] Terada N, Ichioka K, Matsuta Y, Okubo K, Yoshimura K, Arai Y. The natural history of  
461 simple renal cysts. *J Urol* 2002;167:21-3.
- 462 [46] Kurata A, Inoue S, Ohno S, Nakatsubo R, Takahashi K, Ito T, et al. Correlation between  
463 number of renal cysts and aortic circumferences measured using autopsy material. *Pathol*  
464 *Res Pract* 2013;209:441-7.
- 465 [47] Torres VE, Wilson DM, Hattery RR, Segura JW. Renal stone disease in autosomal  
466 dominant polycystic kidney disease. *Am J Kidney Dis* 1993;22:513-9.
- 467 [48] Reeps C, Maier A, Pelisek J, Hartl F, Grabher-Meier V, Wall WA, et al. Measuring and  
468 modeling patient-specific distributions of material properties in abdominal aortic  
469 aneurysm wall. *Biomech Model Mechanobiol* 2013;12:717-33.
- 470 [49] Mehta M, Veith FJ, Lipsitz EC, Ohki T, Russwurm G, Cayne NS, et al. Is elevated  
471 creatinine level a contraindication to endovascular aneurysm repair? *J Vasc Surg*  
472 2004;39:118-23.
- 473

**A**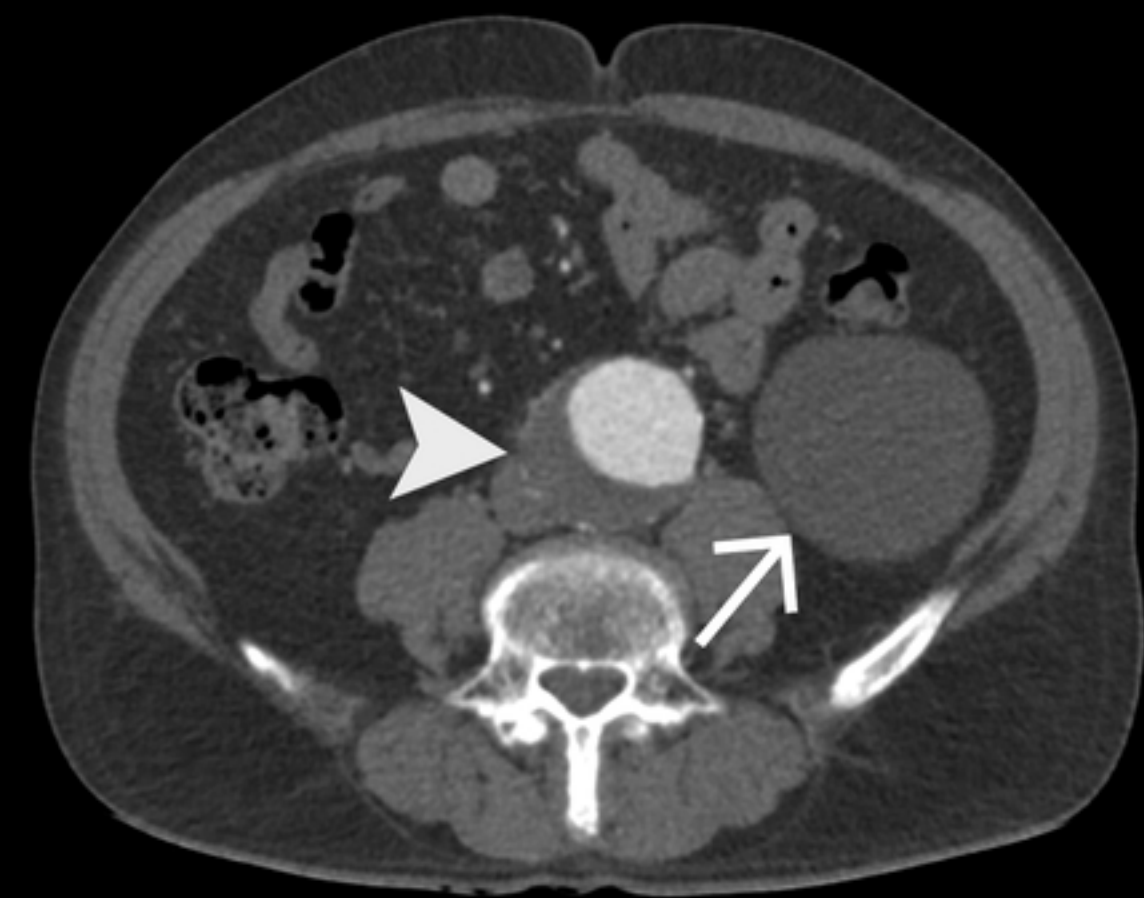**B**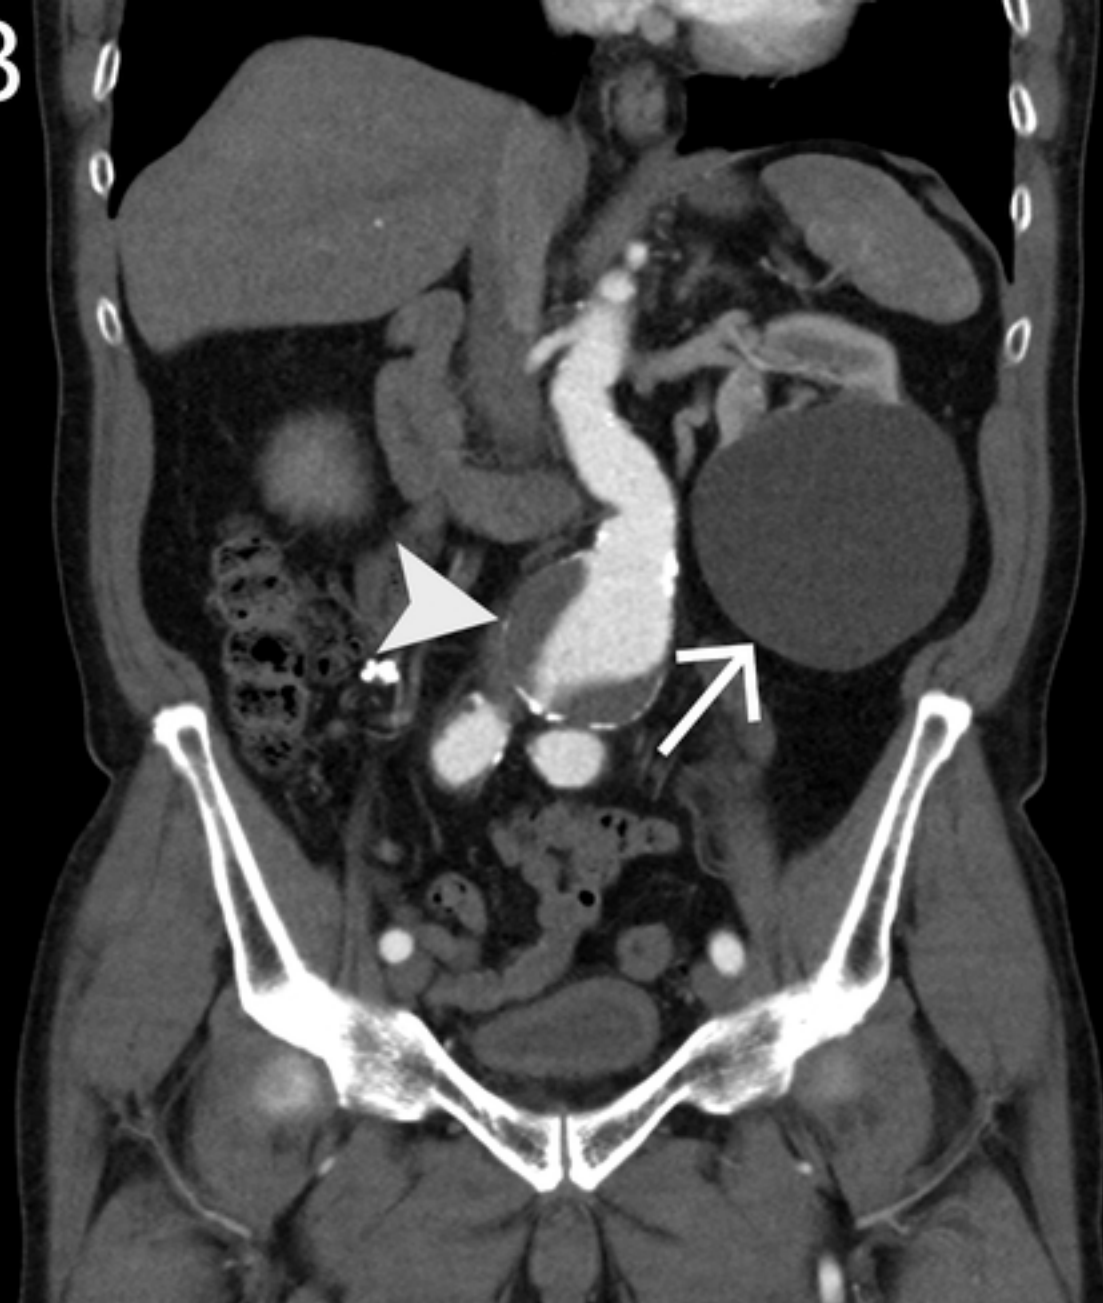

Figure
